# Supplementary material for: Mild Chronic Kidney Disease Associated with Low Bone Formation and Decrease in Phosphate Transporters and Signaling Pathways Gene Expression
Source: Preprints.org preprint supplement (doi:10.20944/preprints202302.0207.v1), 2023-02-13
Supplement: Supplementary file 1 [file supplementary]

**Table S1.** **Primer and probe sequences for RT-PCR**

| **Gene** | **Primer sequence (5'→3')** | **Probe R-sequence–Q (5'→3')** |
| --- | --- | --- |
| *Slc20a1* | F: CTCATCCTGGGCTTCATCAT | FAM-CATTTGTCTTGGCATTCTCCGTGGG-BHQ1 |
| R: CCGGATGGTTTCACTCACTT |
| *Slc20a2* | F: GCTCTACCATTGGCTTCTCG | R6G-ATCGTTGCCTCCTGGTTCATATCCC-BHQ1 |
| R: ACAGAGGAAGTGCCTGGAGA |
| *Xpr1* | F: AAGACGTGATTCTGCGCTTT | ROX-TGCTACAACTTTTAAGCCTCATGTTGGG-BHQ2 |
| R: CACGGAATTCACCACAGTTG |
| *Ctnnb1* | F: GCCAGTGGATTCCGTACTGT | Cy5-CACCACGCTGCATAATCTCCTGCT-BHQ2 |
| R: GAGCTTGCTTTCCTGATTGC |
| *Mapk3* | F: TCCAAGGGCTACACCAAATC | FAM-CTACCTGGACCAGCTCAACCACA-BHQ1 |
| R: AGGTAGTTTCGGGCCTTCAT |
| *Mapk1* | F: TTGCTGAAGCACCATTCAAG | R6G-CAGGACAAGGGCTCAGAGGACTG-BHQ1 |
| R: ACGGCTCAAAGGAGTCAAGA |
| *Fgf23* | F: TGGGCACTGCTAGAGCCTAT | ROX-CAAGGTGTACAGTGACCCCCAGC-BHQ2 |
| R: GCGGAGATCCATACAAAGGA |
| *Ankh* | R: TTCACCTCGATGTGCTTCAG | FAM-CAGTCTTCCACACCCTGATAGCCTBHQ1 |
| F: CAAGAGAGACAGGGCCAAAG |
| *Lgr4* | R: AAGGCAGCGAGATACAGGAA | R6G-CCCTCTTAGCTTTGCTGGGTGC-BHQ1 |
| F: GGGAAGAGCAGTCACCTCAG |
| *Sost* | R: TAACGATGGGGTTTCTCCTG | ROX-CTGCTTGTACATGCAGCCTTCGT-BHQ2 |
| F: CAGCTCTCACTAGCCCCTTG |
| *Dkk1* | R: CGGTTCATGGTCTGGTTGTT | Cy5-CCAACAGCCTAAATGCGATGGACTC-BHQ2 |
| F: TTACTGTGGGGAAGGTCTGG |
| *Fgfr2* | R: ACATCCTTGGGATTGAGCTG | FAM-ACGAAACCAGCACTGGAGCCTTATT-BHQ1 |
| F: ACTGGACCAACACCGAAAAG |
| *Sfrp2* | R: CTCCACCAGGCAGGTGTAAT | R6G-TGGGACAGAAACAGGGTGGAGAG-BHQ1 |
| F: TGTCCGATAGGGACCTGAAG |
| *Fzd2* | R: CGAGAAGCCACTCCACTAGG | ROX-CCTCAAGGTGCCGTCCTATCTCA-BHQ2 |
| F: GAACTCCTGCGCTACTCACC |
| *Wnt10b* | R: TCCTCCTGCGAGAAGAACAT | Cy5-CCAGCCCTATTCCTGGCTCTGTC-BHQ2 |
| F: GCACTGTCTAGGGGCAAGAG |
| *Kl* | R: CACTTCCGCTTCAGGTTTTC | FAM-ATGGTGGCGGTTTTAAACAGGCA-BHQ1 |
| F: AGCTGCTTGTGTTGTGATGC |
| *Sp7* | R: TACGGGGGTGCTGTAGAAAC | R6G-AGCTCACTATGGCTCCAGTCCC-BHQ1 |
| F: CACTGGCTCCTGGTTCTCTC |
| *Bmp4* | R: GGGGCTGAAAGGTCAGTGTA | ROX- TCTCTGAGCCTTTCCAGCAAGTTTGT-BHQ2 |
| F: TAGGAGCCATTCCGTAGTGC |
| *Tnfrsf11B* | R: CTTCCCGGTCTCAGGTATCA | Cy5-TGGGAATGAAGATCCTCCAGCCC-BHQ2 |
| F: GAATGGTCACTGGGCTGTTT |
| *Tnfsf11* | R: CCTCTTTCTCAGGGTGCTTG | FAM-TCAGGCATCATGAAACCTCAGGGAG-BHQ1 |
| F: CATCGGGTTCCCATAAAGTCAGT |
| *Dmp1* | R: GAACTTGGGATTTTGATGCTGGT | R6G-CAGTCCAGTGAAGACAGCACGTCT-BHQ1 |
| F: CGGCTGGTGGTCTCTCTAAG |
| *Vdr* | R: CATCACTGTGGTGGTCCTTG | ROX-CCTGTCTCCTCTCTCCATGCTGCBHQ2 |
| F: AACTCCTCCTCCTCCAGCTC |
| *Cyp27b1* | R: CTGGTCATCGGAGGTGAGAT | Cy5-ATGGGGACAGTTGAAACTGCACCTT-BHQ2 |
| F: GGTGAGAGGCTTGGCTAGTG |
| *Gapdh* | R: TCTGGAGTTCAGGAGCCAGT | R6G-TGCCAGCCTCGTCTCATAGACAAG-BHQ1 |
| F: AGACAGCCGCATCTTCTTGT |

*Slc20a1* – solute carrier family 20 member 1 (Pit-1), *Slc20a2* – solute carrier family 20 member 2 (Pit2), *Xpr1* – xenotropic and polytropic retrovirus receptor 1, *Ankh* – ANKH PPi transport regulator, *Fgf23* – fibroblast growth factor 23, *Fgfr2* – fibroblast growth factor receptor 2, *Mapk3* – mitogen activated protein kinase 3 (Erk1), *Mapk1* – mitogen activated protein kinase 1 (Erk2), *Ctnnb1* – catenin beta 1, *Sost* – sclerostin, *Dkk1* – dickkopf 1, *Sfrp2* – secreted frizzled-related protein 2, *Fzd2* – frizzled class receptor 2, *Wnt10b* – Wnt family member 10B, *KL* – Klotho, *Sp7* – Sp7 transcription factor (osterix), *Bmp4* – bone morphogenetic protein 4, *Dmp1* – dentin matrix acidic phosphoprotein 1, *Vdr* – vitamin D receptor, *Cyp27b1* – cytochrome P450, family 27, subfamily b, polypeptide 1 (1-alpha-(OH)ase), *Tnfrsf11B* – TNF receptor superfamily member 11 B (OPG), *Tnfsf11* – TNF superfamily member 11 (RANKL), *Lgr4* – leucine-rich repeat-containing G protein-coupled receptor 4, *Gapdh* – glyceraldehyde-3-phosphate dehydrogenase.
