# Supplementary material for: Mild Chronic Kidney Disease Associated with Low Bone Formation and Decrease in Phosphate Transporters and Signaling Pathways Gene Expression
Source: Preprints.org preprint supplement (doi:10.20944/preprints202302.0207.v1), 2023-02-13
Supplement: Supplementary file 3 [file Table S2.doc]

**Table S2. Bone mRNA relative expressions (tibial diaphysis)**

| **Gene** | **Group 1**  WKY2 | **Group 2**  SO2 | **Group 3**  SO6 | **Group 4**  Nx2 | **Group 5**  Nx6 |
| --- | --- | --- | --- | --- | --- |
| *Fgf23*, fibroblast growth factor 23 | 0.39 (0.32;0.48)2-5* | 0.16 (0.10;0.20) | 0.24 (0.15;0.28) | 0.19 (0.18;0.22) | 0.19 (0.11;0.24) |
| *Fgfr2*, fibroblast growth factor receptor 2 | 0.51 (0.30;0.65)3* | 0.63 (0.43;0.76) | 0.81(0.74;0.91)4,5# | 0.41 (0.30;0.61) | 0.57 (0.35;0.60) |
| *Sfrp2*, secreted frizzled-related protein 2 | 1.28 (0.76;4.14) | 1.41 (0.78;4.53) | 1.35 (0.77;1.86) | 2.16 (0.47;5.23) | 0.50 (0.46;2.62) |
| *Fzd2*, frizzled class receptor 2 | 0.72 (0.30;5.40) | 0.42 (0.31;11.35) | 0.69 (0.43;1.56) | 1.64 (0.14;11.96) | 0.25 (0.23;3.84) |
| *Wnt10b*, wnt family member 10B | 0.02 (0.02;0.03) | 0.03 (0.01;0.04) | 0.02 (0.02;0.03) | 0.02 (0.01;0.04) | 0.02 (0.01;0.03) |
| *Kl*, klotho | 0.56 (0.14;2.72) | 0.22 (0.13;2.57) | 0.31 (0.19;1.77) | 1.44 (0.05;3.76) | 0.22 (0.11;1.92) |
| *Dmp1*, dentin matrix acidic phosphoprotein 1 | 3.36 (2.38;3.55) | 4.07 (3.11;6.80) | 2.38 (1.71;4.98) | 2.39 (0.88;5.83) | 2.25 (1.40;5.00) |
| *Cyp27b1*, cytochrome P450, family 27, subfamily b, polypeptide 1 | 0.37 (0.17;2.28) | 0.22 (0.10;4.15) | 0.32 (0.16;1.07) | 1.24 (0.06;3.49) | 0.21 (0.10;1.12) |
| *Tnfrsf11B*, TNF receptor superfamily member 11B | 0.39 (0.35;1.78) | 0.25 (0.18;2.78) | 0.57 (0.23;1.62) | 1.01 (0.06;3.86) | 0.16 (0.14;2.03) |
| *Tnfsf11*, TNF superfamily member 11 | 0.75 (0.25;2.95) | 0.24 (0.11;2.49) | 0.35 (0.21;1.38) | 1.50 (0.10;4.42) | 0.25 (0.13;1.58) |
| *Lrg4*, leucine-rich repeat-containing G protein-coupled receptor 4 | 1.36 (0.81;3.93) | 0.93 (0.64;6.06) | 1.32 (0.89;2.61) | 2.01 (0.30;8.04) | 0.50 (0.43;2.94) |

Superscripts show p-values vs named groups; *P<0.05, #P<0.001.
